# Supplementary material
Source: PubMed Central journal article supplement (PMC5894876)

**A Quantification of ER-alpha staining**

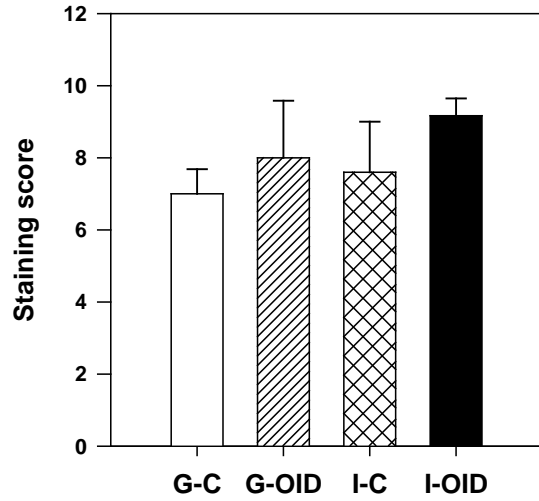

ER-alpha IHC in Mammary Tumor

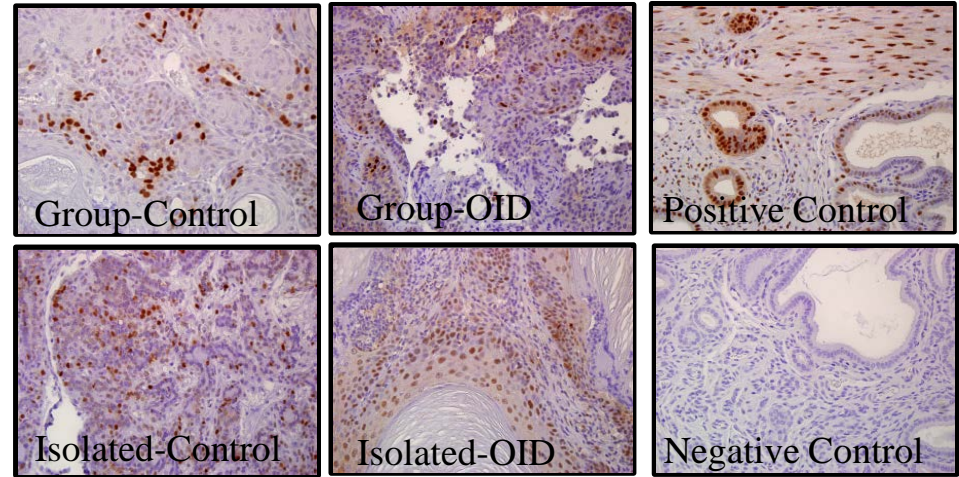

**B Quantification of PgR Staining**

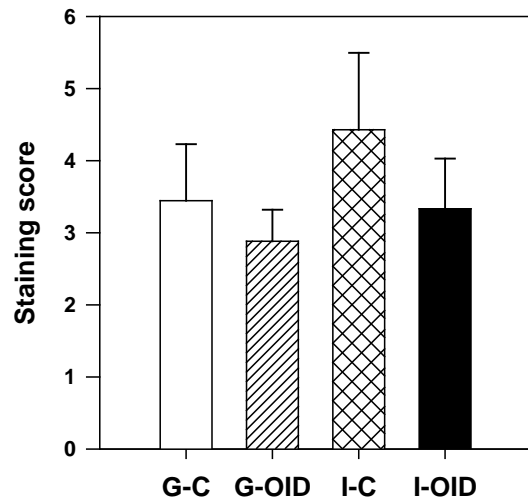

PgR IHC in Mammary Tumor

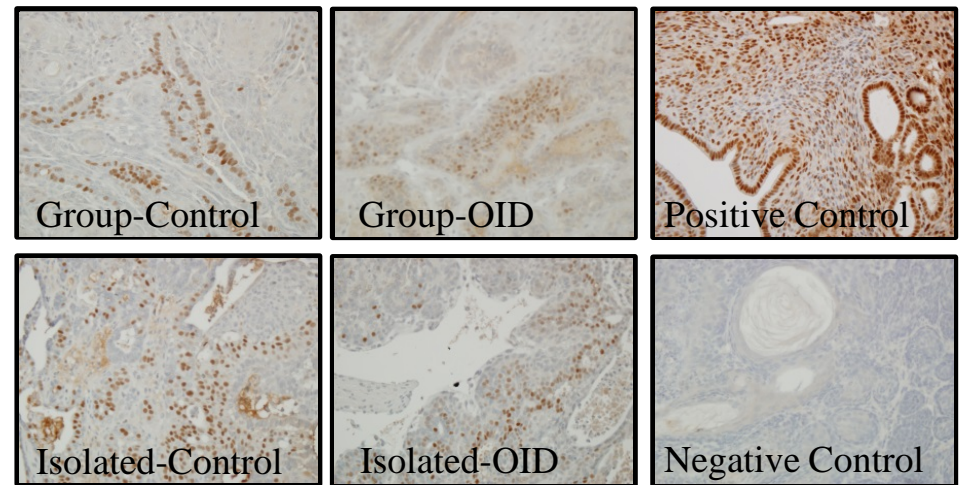

Supplement: NIHMS949499-supplement-Figure_2.pdf [file NIHMS949499-supplement-Figure_2.pdf]
