# Supplementary material
Source: PubMed Central journal article supplement (PMC5894876)
Supplement: NIHMS949499-supplement-Table_1.pdf [file NIHMS949499-supplement-Table_1.pdf]

| <b>Target gene</b>             | <b>Forward sequence</b>   | <b>Reverse sequence</b> |
|--------------------------------|---------------------------|-------------------------|
| <b>Cyclin D1</b>               | CCTCCATAAAGTCCTGTTCCC     | AGGGTACTTTGGTCTGTTTTCC  |
| <b>DRAM1</b>                   | CATCGGAATGGGCATCGTAG      | GGGACAGGATTTGTAGGAGATG  |
| <b>HPRT1</b>                   | CCTCATGGACTGATTATGGACAG   | TCAGCAAAGAACTTATAGCCCC  |
| <b>IL-1<math>\beta</math></b>  | ATGGGCAACCACTTACCTATTT    | GTTCTAGAGAGTGCTGCCTAATG |
| <b>IL-6</b>                    | CTCCATCCAGTTGCCTTCT       | CTCCGACTTGTGAAGTGGTATAG |
| <b>JNK1</b>                    | TCCAGCACCCATACATCAAC      | CTTCATCTAACTGCTTGCCG    |
| <b>MDM2</b>                    | GCGTGGAATTTGAAGTTGAGTC    | CTGTATCGCTTTCCTGTCTG    |
| <b>NPY1R</b>                   | GAATGACAATGAAAAAGTCTGAAGC | GGCTGTGCTTGTTCCTCCAC    |
| <b>PPAR<math>\gamma</math></b> | AGAAGTGCCTTGCTGTGG        | CAACAGCTTCTCCTTCTCGG    |
| <b>P53</b>                     | ATTGGGACCATCCTGGCTGTAG    | CGAGGCTGATATCCGACTGTGA  |
| <b>TNF-<math>\alpha</math></b> | CTACCTTGTTGCCTCCTCTTT     | GAGCAGAGGTTTCAGTGATGTAG |

Supplementary Table 1
