# Supplementary material
Source: PubMed Central journal article supplement (PMC5894876)
Supplement: NIHMS949499-supplement-Table_2.pdf [file NIHMS949499-supplement-Table_2.pdf]

|              | Tumor Type          |                        |                       | Tumor grade | N  |
|--------------|---------------------|------------------------|-----------------------|-------------|----|
|              | Adenocarcinoma (AC) | AC with squamous cells | Adeno-myoeplithelioma |             |    |
| <b>G-C</b>   | 6 (55%)             | 5 (45%)                | 0 (0%)                | 2.43        | 11 |
| <b>G-OID</b> | 13 (62%)            | 7 (33%)                | 1 (5%)                | 2.41        | 21 |
| <b>I-C</b>   | 11 (69%)            | 4 (25%)                | 1 (6%)                | 2.44        | 16 |
| <b>I-OID</b> | 10 (56%)            | 7 (39%)                | 1 (5%)                | 2.21        | 18 |

Supplementary Table 2
