# Supplementary material
Source: PubMed Central journal article supplement (PMC5894876)

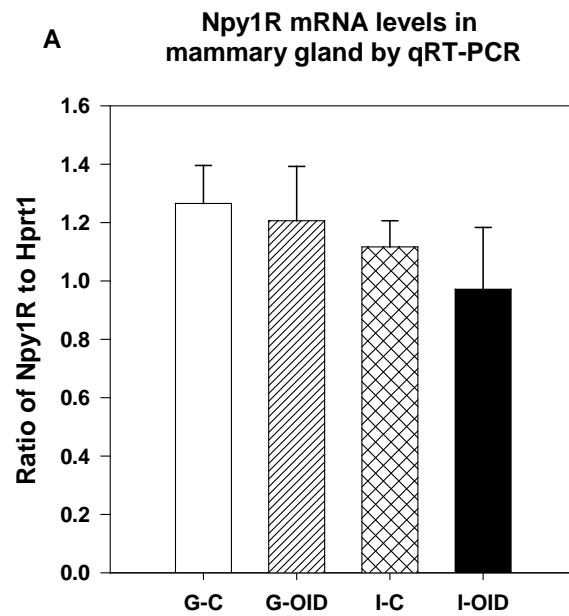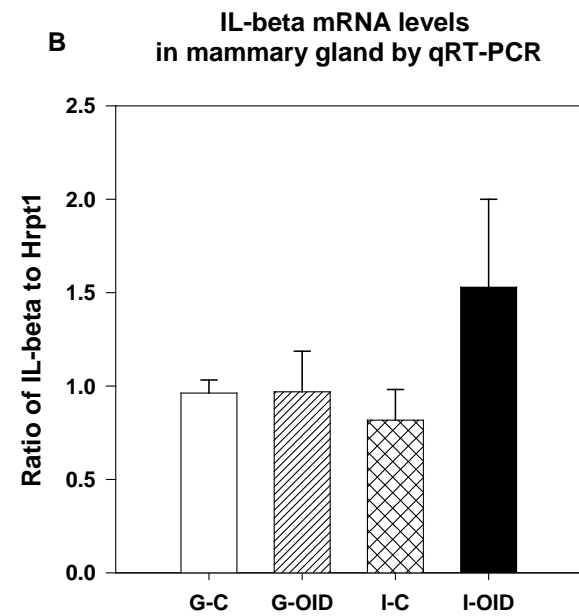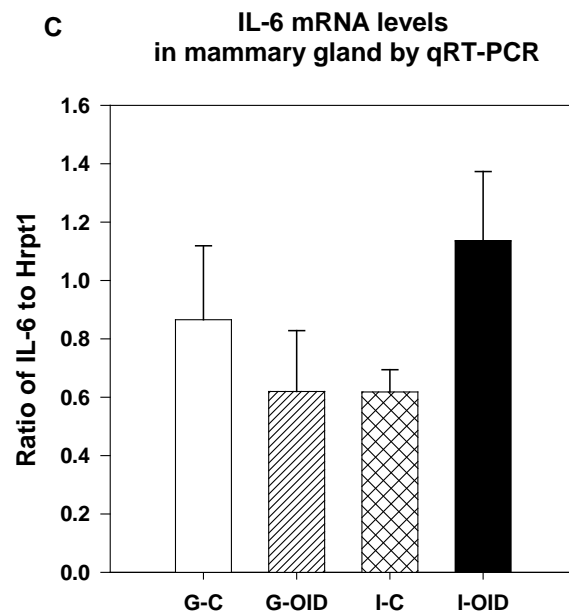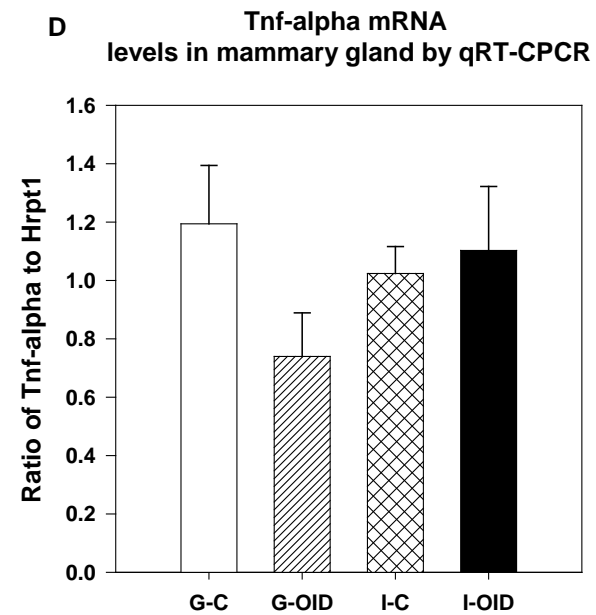

Supplementary Figure 1

Supplement: NIHMS949499-supplement-Figure_1.pdf [file NIHMS949499-supplement-Figure_1.pdf]
